# Supplementary material for: Computer-Aided Diagnosis of Serrated Colorectal Lesions Using Non-Magnified White Light Endoscopic Images
Source: Research Square preprint supplement (doi:10.21203/rs.3.rs-1542284/v1), 2022-04-14
Supplement: Supplementary file 1 [file 000a85bc09cb9d958aece9e0.docx]

| Supplementary Table 3. Endoscopist’s Probability Score | | |  |
| --- | --- | --- | --- |
| Endoscopic Diagnosis | | Confidence Level | Probability Score |
| Step 1 | Step 2 |
| Tubular adenoma | Sessile serrated Adenoma/polyp | High | 1 |
| Middle | 0.8 |
| Low | 0.6 |
| Serrated lesions | Microvesicular type Hyperplastic polyp | Low | 0.4 |
| Middle | 0.2 |
| High | 0 |
