# Supplementary material for: Computer-Aided Diagnosis of Serrated Colorectal Lesions Using Non-Magnified White Light Endoscopic Images
Source: Research Square preprint supplement (doi:10.21203/rs.3.rs-1542284/v1), 2022-04-14
Supplement: Supplementary file 2 [file 910ed472fb851447d8db36b1.docx]

| Supplementary Table 4A. Diagnostic Performance of CADx1 | | | |  |
| --- | --- | --- | --- | --- |
| Probability Score* | Sensitivity | Specificity | Accuracy |  |
| 5% | 97.7% | 21.9% | 52.56% |  |
| 10% | 93.1% | 32.8% | 57.21% |  |
| 15% | 87.4% | 47.7% | 63.72% |  |
| 20% | 85.1% | 53.9% | 66.51% |  |
| 25% | 83.9% | 60.2% | 69.8% |  |
| 30% | 83.9% | 67.2% | 74.0% |  |
| 35% | 81.6% | 82.0% | 81.9% |  |
| 40% | 78.2% | 85.9% | 82.8% |  |
| 45% | 75.9% | 86.7% | 82.3% |  |
| 50% | 72.4% | 89.1% | 82.3% |  |
| 55% | 70.1% | 89.1% | 81.4% |  |
| 60% | 62.1% | 93.0% | 80.5% |  |
| 65% | 57.5% | 93.0% | 78.6% |  |
| 70% | 52.9% | 93.0% | 76.7% |  |
| 75% | 50.6% | 96.1% | 77.7% |  |
| 80% | 44.8% | 97.7% | 76.3% |  |
| 85% | 42.5% | 97.7% | 75.3% |  |
| 90% | 40.2% | 97.7% | 74.4% |  |
| 95% | 39.1% | 98.4% | 74.4% |  |
| CADx1: computer-aided diagnosis for differentiating tubular adenoma from serrated lesions | | | | |
| *Probability score is the threshold used in the ROC curve for tubular adenoma by CADx2 (Figure 2) | | | | |
| CADx1 system generated a probability score of each image for tubular adenoma | | | | |
