# Supplementary material for: Computer-Aided Diagnosis of Serrated Colorectal Lesions Using Non-Magnified White Light Endoscopic Images
Source: Research Square preprint supplement (doi:10.21203/rs.3.rs-1542284/v1), 2022-04-14
Supplement: Supplementary file 3 [file bf7f502fcf8747258ab8ad7d.docx]

| Supplementary Table 5. Diagnostic performance by endoscope manufacturer | | | | |
| --- | --- | --- | --- | --- |
|  |  | Endoscope Manufacturer | | |
|  |  | Fujifilm | Olympus | p-value |
| TA vs. Serrated lesions** |  |  |  |  |
| AUC, % [95%CI] | CADx1 | 80 [73-86] | 87 [76-94] | 0.25 |
|  | Expert 1 | 86 [80-92] | 87 [78-97] | 0.77 |
|  | Expert 2 | 64 [55-73] | 85 [75-94] | **0.0016** |
| Accuracy, % [95%CI] | CADx1 | 84 [77-91] | 90 [82-97] | 0.32 |
|  | Expert 1 | 78 [71-84] | 85 [77-94] | 0.19 |
|  | Expert 2 | 61 [53-68] | 75 [65-85] | **0.039** |
| SSAP vs. MVHP |  |  |  |  |
| AUC, % [95%CI] | CADx2 | 74 [63-83] | 45 [30-60] | **0.001** |
|  | Expert 1 | 72 [60-85] | 58 [41-75] | 0.18 |
|  | Expert 2 | 87 [77-96] | 65 [50-80] | **0.0195** |
| Accuracy, % [95%CI] | CADx2 | 55 [41-68] | 46 [29-63] | 0.44 |
|  | Expert 1 | 70 [60-80] | 62 [48-76] | 0.31 |
|  | Expert 2 | 77 [67-86] | 55 [41-70] | **0.013** |
| CADx: computer-aided diagnosis; TA: tubular adenoma; | | | |  |
| CI: confidence interval; AUC: area under curve | | |  |  |
| SSAP: sessile serrated adenoma/polyp; MVHP: microvesicular hyperplastic polyp | | | | |
| p-values are calculated using chi-square test | | |  |  |
| ** Serrated lesions include SSL and MVHP | | | | |
